# Supplementary material for: Reduced graphene oxide-supported Ag-loaded Fe-doped TiO2 for the degradation mechanism of methylene blue and its electrochemical properties
Source: PubMed Central journal article supplement (PMC9078252; doi:10.1039/c7ra13418e), 2018-02-09
Supplement: RA-008-C7RA13418E-s001.pdf [file RA-008-C7RA13418E-s001.pdf]

## Electronic Supplementary Information

Reduced graphene oxide supported Ag-loaded Fe-doped TiO<sub>2</sub> for methylene blue degradation mechanism and its electrochemical properties

Dhayanantha Prabu Jaihindh, Ching Cheng Chen, Yen Pei Fu\*

Department of Materials Science and Engineering, National Dong Hwa University,  
Shou-Feng, Hualine, 97401, Taiwan

\* Corresponding author: ypfu@gms.ndhu.edu.tw

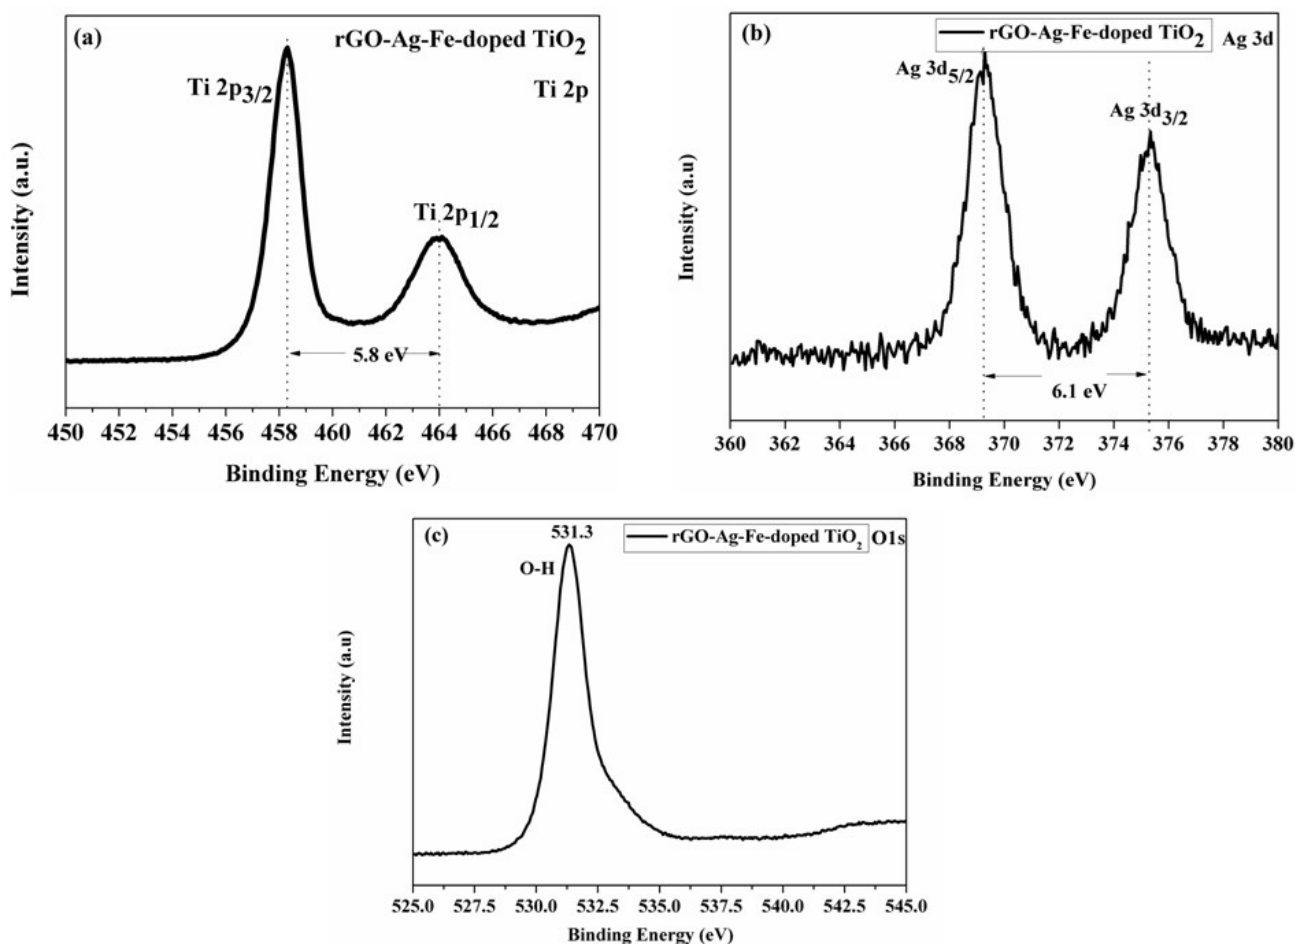

**Figure S1.** (a) Ti 2p, (b) Ag 3d, and (c) O 1s spectrum for rGO/Ag/Fe-doped TiO<sub>2</sub>.

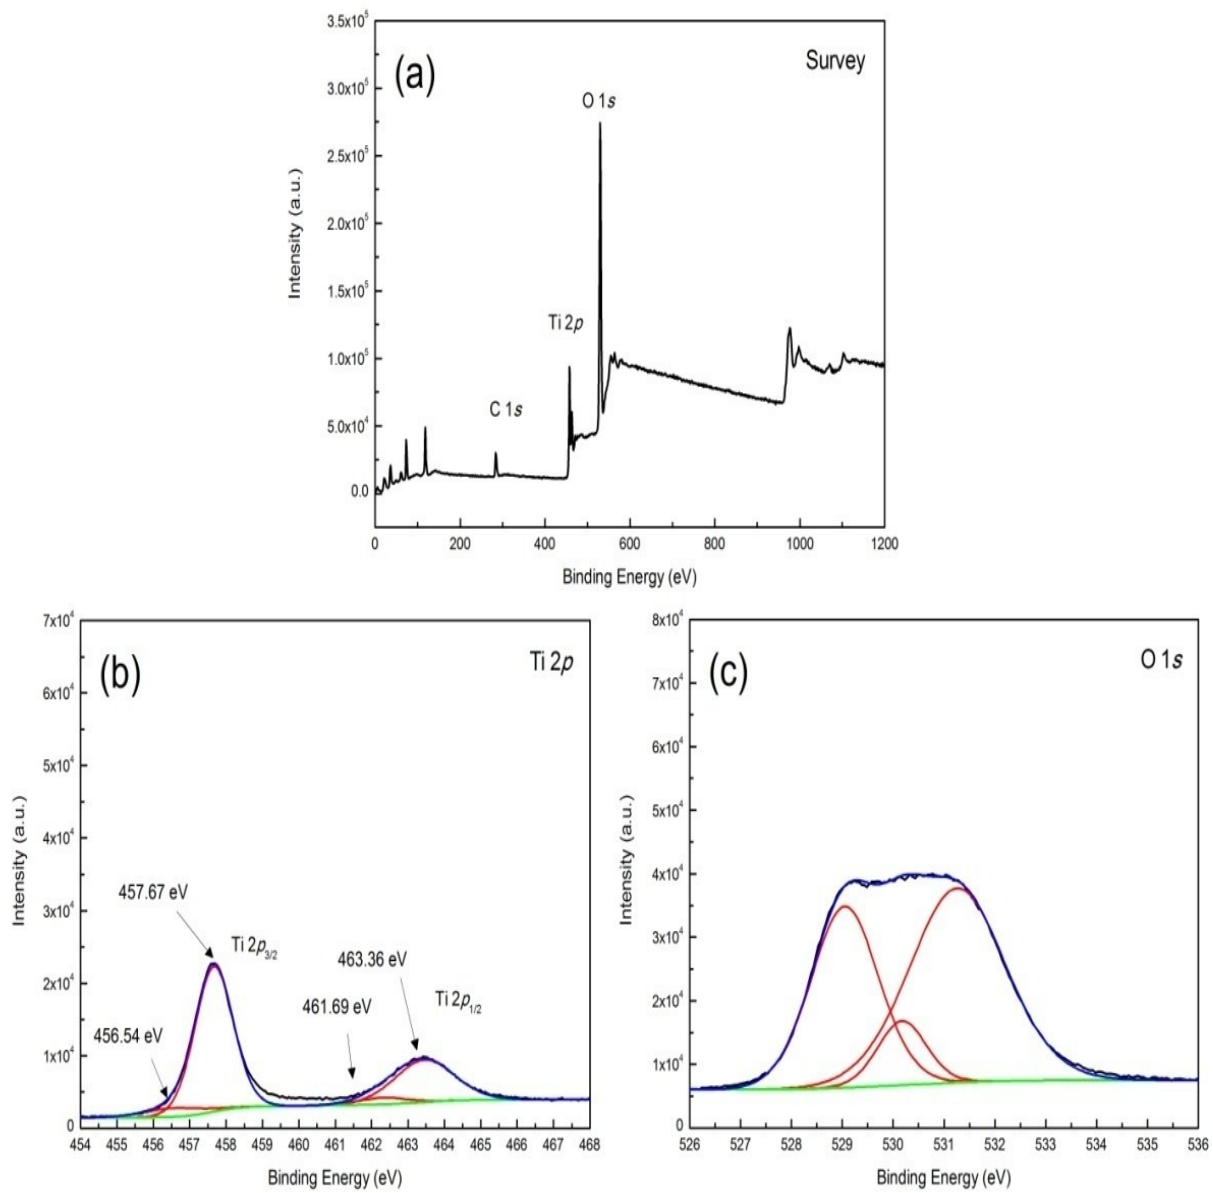

**Figure S2. XPS spectra of  $\text{TiO}_2$**

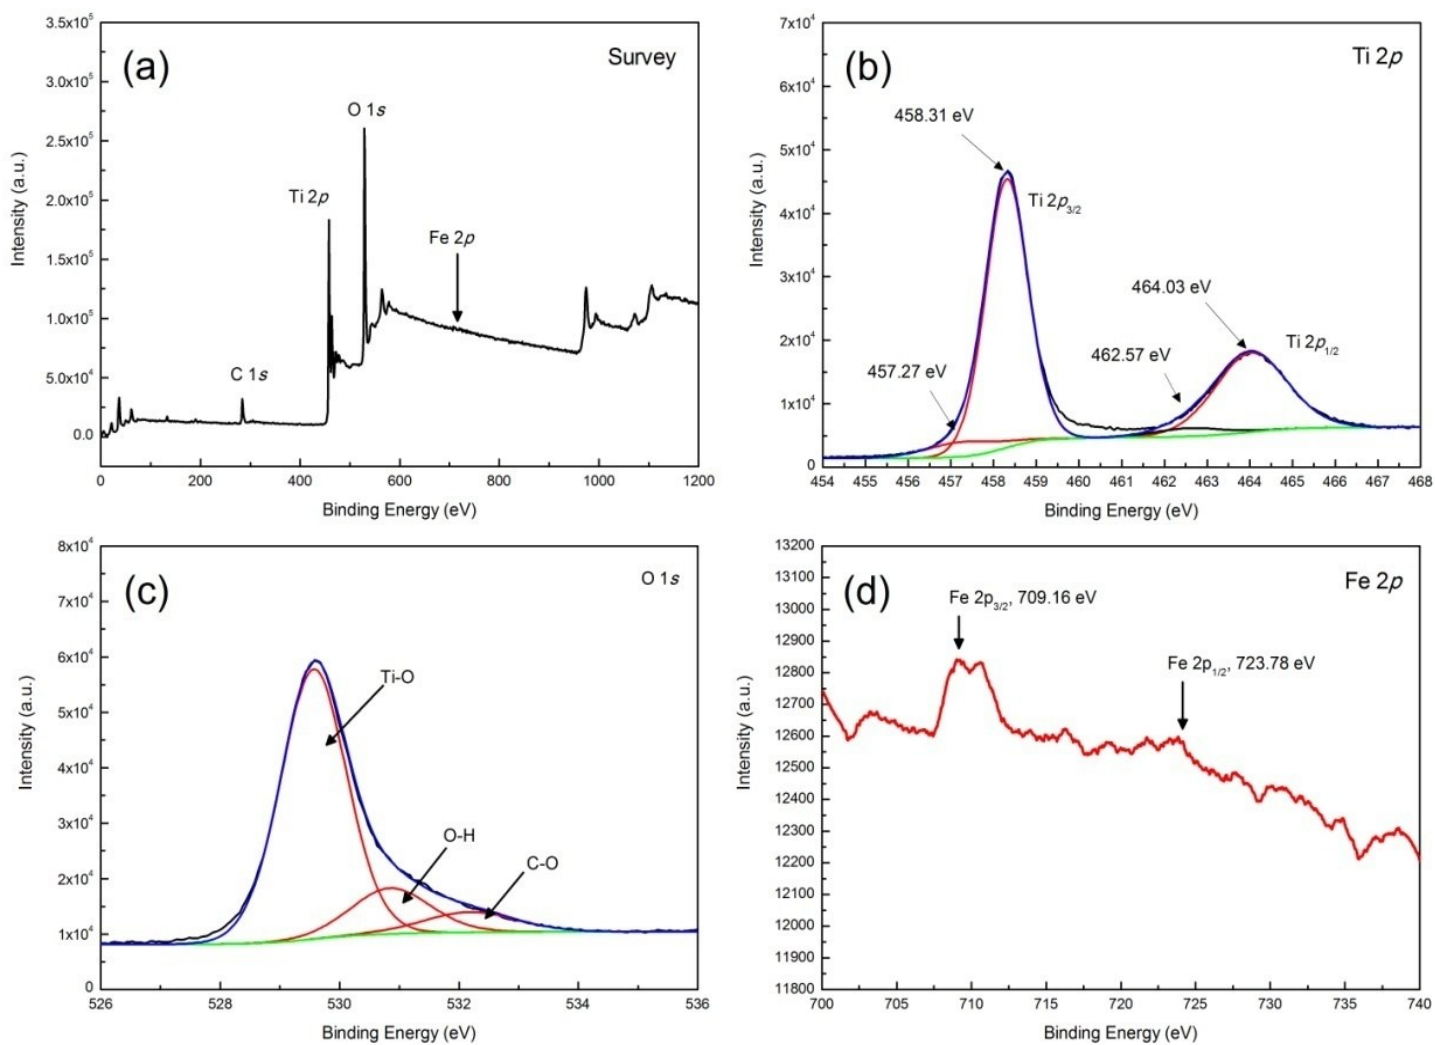

**Figure S3. XPS spectra of Fe-doped TiO<sub>2</sub>**

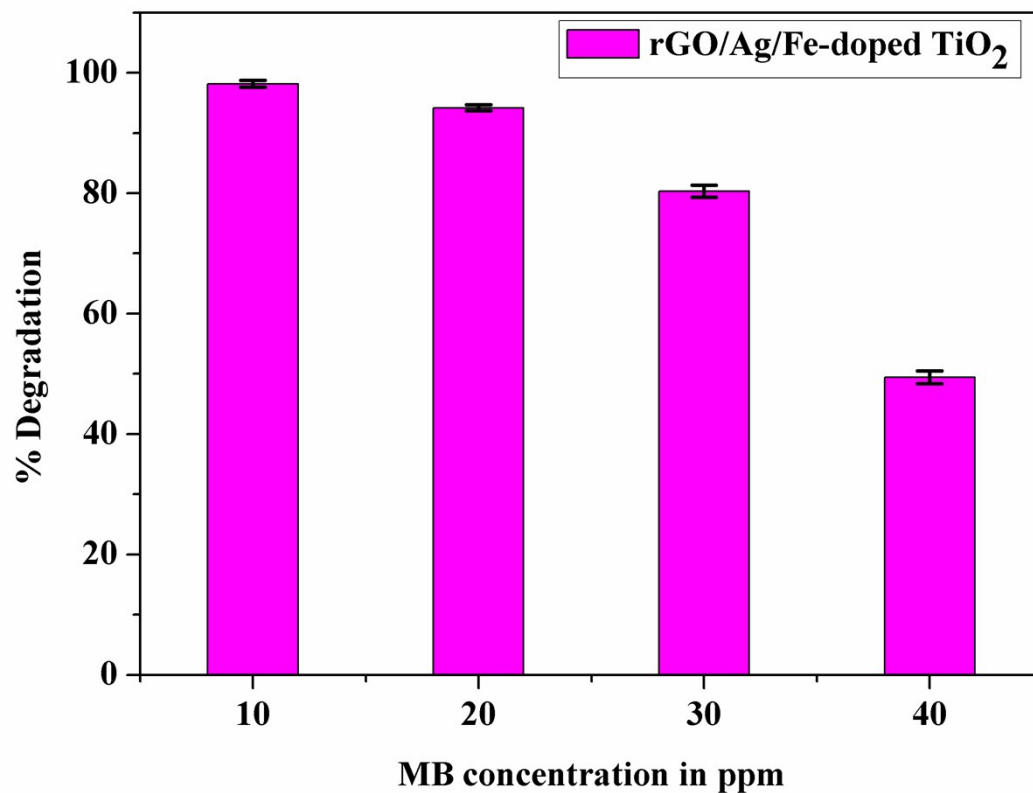

**Figure S4.** Effect of different MB concentration on rGO/Ag/Fe-doped TiO<sub>2</sub> (10 mg). Error bars represent standard deviations of three-times measurements

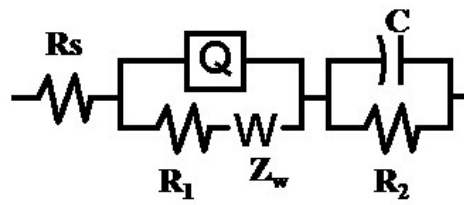

**Figure S5:** Equivalent circuit of EIS

$R_s$ : Solution resistance

$Q$ : Constant phase element  $Q=C$  (capacitor)

$Z_w$ : Warburg constant

$R_1, R_2$ : Charge transfer resistance

**Table S1:** Current density values in dark and light irradiation

| Photocatalysts                   | Current density (mA cm <sup>-2</sup> ) | Current density (mA cm <sup>-2</sup> ) |
|----------------------------------|----------------------------------------|----------------------------------------|
|                                  | In dark                                | In light                               |
| Fe-doped TiO <sub>2</sub>        | 0.102                                  | 0.176                                  |
| rGO/Fe-doped TiO <sub>2</sub>    | 0.473                                  | 0.755                                  |
| rGO/Ag/Fe-doped TiO <sub>2</sub> | 0.571                                  | 1.39                                   |
